# Supplementary material
Source: Research Square preprint supplement (doi:10.21203/rs.3.rs-8881508/v1)
Supplement: Supplementary file 1 [file 2151e14f6333db97ea4b76a2.xlsx]

## Sheet: Microplastic Counts
Date	Counts
2024-06-04	0
2024-06-04	15
2024-06-04	18
2024-06-04	5
2024-06-04	6
2024-06-04	0
2024-06-04	0
2024-06-04	7
2024-06-19	27
2024-06-19	8
2024-06-28	30
2024-06-28	27
2024-09-06	40
2024-09-06	22
2024-09-23	31
2024-09-25	26
2024-09-25	34
2024-09-27	38
2024-09-27	28
2024-10-08	26
2024-10-14	23
2024-11-18	25
2024-11-22	31
2024-11-22	29
2024-12-05	57
2024-12-05	72
2024-12-11	62
2024-12-11	50
2024-12-15	60
2024-12-15	47
2025-01-01	115
2025-01-01	88
2025-01-06	53
2025-01-06	81
2025-01-22	70
2025-01-22	87
2025-01-31	57
2025-01-31	42
2025-02-05	68
2025-02-05	86
2025-02-26	65
2025-02-26	53
2025-03-05	66
2025-03-05	55
2025-03-22	27
2025-03-22	21
2025-04-12	51
2025-04-12	30
2025-04-24	26
2025-04-24	22
2025-05-16	39
2025-05-16	35
2025-05-20	20
2025-05-20	25
2025-06-06	26
2025-06-06	35
2025-06-16	22
2025-06-16	15
2025-07-06	17
2025-07-06	28
2025-07-30	11
2025-07-30	12
2025-08-11	6
2025-08-11	20
2025-08-13	7
2025-08-13	12

## Sheet: Average Microplastic Counts
Date	Average Counts
2024-06-04	5.25
2024-06-19	17.5
2024-06-28	28.5
2024-09-06	31
2024-09-23	31
2024-09-25	30
2024-09-27	33
2024-10-08	26
2024-10-14	23
2024-11-18	25
2024-11-22	30
2024-12-05	64.5
2024-12-11	56
2024-12-15	53.5
2025-01-01	101.5
2025-01-06	67
2025-01-22	78.5
2025-01-31	49.5
2025-02-05	77
2025-02-26	59
2025-03-05	60.5
2025-03-22	24
2025-04-12	40.5
2025-04-24	24
2025-05-16	37
2025-05-20	25.5
2025-06-06	30.5
2025-06-16	18.5
2025-07-06	22.5
2025-07-30	11.5
2025-08-11	13
2025-08-13	9.5

## Sheet: Environmental Variables
Date	Total Precipitation (mm)	Average Wind Speed (kph)	Maximum Wind Gusts (kph)	Average Temperature	Discharge
2024-06-04	0	1.9308	16.7336	23.1667	0.0367343
2024-06-19	0	1.38374	16.5727	24.7778	0.0333135
2024-06-28	0	4.5052	20.917	22.8333	0.0293863
2024-09-06	0	1.7699	13.6765	18.6111	0.021995
2024-09-23	0.254	1.51246	14.481	17.6111	0.0170841
2024-09-25	4.572	2.2526	18.6644	17.8333	0.0108105
2024-09-27	7.366	1.9308	20.1125	20.5556	0.0170841
2024-10-08	0	3.7007	22.526	15.0556	0.0118944
2024-10-14	0	3.7007	22.8478	18.6667	0.0161175
2024-11-18	0	2.8962	26.0658	8.61111	0.0272064
2024-11-22	6.604	5.9533	31.3755	3.16667	0.0475357
2024-12-05	0	5.3097	50.8444	2.88889	0.0151932
2024-12-11	8.89	4.1834	23.8132	12.3889	0.0520119
2024-12-15	0	1.7699	13.1938	-3	0.0122736
2025-01-01	9.144	6.436	47.1437	7.44444	0.0238505
2025-01-06	0.254	3.7007	26.3876	-3.38889	0.011163
2025-01-22	0	3.218	22.3651	-11.9444	0.00800653
2025-01-31	8.636	3.218	25.1004	3.77778	0.0161175
2025-02-05	0	4.827	23.3305	0.333333	0.0122736
2025-02-26	0	4.1834	27.353	6.22222	0.0180945
2025-03-05	26.67	8.8495	49.5572	11.2778	0.0349919
2025-03-22	0	4.0225	35.5589	6.61111	0.0202519
2025-04-12	34.036	9.1713	28.6402	4.88889	0.0593222
2025-04-24	0	2.2526	20.7561	17.5	0.0226007
2025-05-16	36.322	1.06194	29.6056	18.1667	0.0413809
2025-05-20	0	6.7578	36.5243	13.7222	0.00601531
2025-06-06	0	1.14239	19.7907	23.3889	0.00800653
2025-06-16	3.302	2.7353	12.7111	16.2222	0.00720854
2025-07-06	0	1.23893	11.5848	24.5	0.00537585
2025-07-30	0	0.8045	15.1246	27.9444	0.00800653
2025-08-11	0	1.22284	16.8945	21.6111	0.00695656
2025-08-13	9.652	1.06194	17.699	25	0.00361197
