# Supplementary material
Source: Research Square preprint supplement (doi:10.21203/rs.3.rs-8881508/v1)
Supplement: Supplementary file 1 [file f24e9791517b12033c0f15cd.docx]

**Supplemental Table 1.** FTIR characteristic peak assignment for our plastic standards

| **Polymer** | **FTIR Transmission Assignment** | **Characteristic Peaks (cm -1)** |
| --- | --- | --- |
| Polyester (PE) | C = O stretching  C – O stretching  Aromatic CH out-of-plane bending | 1711  1242, 1095  722 |
| High density polyethylene (HDPE) | C-H stretching  CH2 bending | 2913, 2847  1471 |
| Polyvinyl chloride (PVC) | CH2 bending  CH bending  C – C stretching  CH2 rocking  C – Cl stretching | 1424  1331, 1243  1099  965  610 |
| Low density polyethylene (LDPE) | C – H stretching  CH2 bending  CH2 rocking | 2914, 2848  1471  716 |
| Polypropylene (PP) | C – H stretching  CH2 bending  CH3 bending  CH bending, CH3 rocking, C – C stretching  CH3 rocking, CH3 bending, CH bending  CH3 rocking, C – C stretching  CH2 rocking, C- CH3 stretching  CH2 rocking, C – C stretching, C – CH stretching | 2949, 2916, 2866, 2837  1455  1375  1166  997  972  840  808 |
| Polystyrene (PS) | Aromatic C – H stretching  C – H stretching  Aromatic ring stretching  CH2 bending  Aromatic CH bending  Aromatic CH out-of-plane bending | 3024  2847  1601, 1492  1450  1027  695 |
| Nylon (all polyamides) | N – H Stretching  CH stretching  C = O stretching  NH bending, C – N stretching  CH2 bending  NH bending, C = O bending | 3291  2930, 2857  1630  1530  1463, 1369  680 |
